1 **August 17, 2018**

2

3 **Dynamin is required for efficient cytomegalovirus maturation and envelopment**

4

5 Mohammad H. Hasan<sup>1</sup>, Leslie E. Davis<sup>1</sup>, Ratna K. Bollavarapu<sup>1</sup>, Dipanwita Mitra<sup>1</sup>,  
6 Rinkuben Parmar<sup>1</sup> and Ritesh Tandon<sup>1\*</sup>

7

8 <sup>1</sup>Department of Microbiology and Immunology, University of Mississippi Medical Center,  
9 2500 North State Street, Jackson, MS 39216, USA.

10

11 **\*Corresponding Author:** Ritesh Tandon

12 Phone: 601-984-1705, Fax: 601-984-1708, Email: rtandon@umc.edu

13

14 **Keywords:** CMV, virus egress, envelopment, capsids, endosomes, herpes

15

16 **Running title:** Dynamin in MCMV maturation

17 **Abstract:**

18

19 Cytomegalovirus secondary envelopment occurs in a virus-induced cytoplasmic  
20 assembly compartment (vAC) generated via a drastic reorganization of the membranes  
21 of the secretory and endocytic systems. Dynamin is a eukaryotic GTPase that is  
22 implicated in membrane remodeling and endocytic membrane fission events; however,  
23 the role of dynamin in cellular trafficking of viruses beyond virus entry is only partially  
24 understood. Mouse embryonic fibroblasts (MEF) engineered to excise all three isoforms  
25 of dynamin were infected with mouse cytomegalovirus (MCMV-K181). Immediate early  
26 (IE1; m123) viral protein was detected in these triple dynamin knockout (TKO) cells as  
27 well as in mock-induced parental MEF at early times post infection although levels were  
28 reduced in TKO cells, indicating that virus entry was affected but not eliminated. Levels  
29 of IE1 protein and another viral early protein (m04) were normalized by 48 hours post  
30 infection; however, late protein (m55; gB) expression was significantly reduced in  
31 infected TKO cells compared to parental MEF. Ultrastructural analysis revealed intact  
32 stages of nuclear virus maturation in both cases with equivalent numbers of  
33 nucleocapsids containing packaged viral DNA (C-capsids) indicating successful viral  
34 DNA replication, capsid assembly and genome packaging. Most importantly, severe  
35 defects in virus envelopment were visualized in TKO cells but not in parental cells.  
36 Dynamin inhibitor (dynasore) treated MEF showed a phenotype similar to TKO cells  
37 upon MCMV infection confirming the role of dynamin in late maturation processes. In  
38 summary, dynamin-mediated endocytic pathways are critical for the completion of  
39 cytoplasmic stages of cytomegalovirus maturation.

40

41 **Importance:**

42

43 Viruses are known to exploit specific cellular functions at different stages of their life  
44 cycle in order to replicate, avoid immune recognition by the host and to establish a  
45 successful infection. Cytomegalovirus (CMV) infected cells are characterized by a  
46 prominent cytoplasmic inclusion (virus assembly compartment; vAC) that is the site of  
47 virus maturation and envelopment. While endocytic membranes are known to be the  
48 functional components of vAC, knowledge of specific endocytic pathways implicated in  
49 CMV maturation and envelopment is lacking. Here we show that dynamin, which is an  
50 integral part of host endocytic machinery, is largely dispensable for early stages of CMV  
51 infection but is required at a late stage of CMV maturation. Studies on dynamin function  
52 in CMV infection will help us understand the host-virus interaction pathways amenable  
53 to targeting by conventional small molecules as well as by newer generation nucleotide-  
54 based therapeutics (e.g. siRNA, CRISPR/CAS gRNA, etc.).

55 **Introduction:**

56

57 Endocytic pathways are important for cellular entry of several viruses (1-5); however,  
58 their role in post-entry stages of virus replication is far from resolved. Maturing  
59 herpesvirus nucleocapsids undergo primary envelopment at the inner nuclear  
60 membrane, traverse through the nuclear envelope, uncoat at the outer nuclear  
61 membrane and reach the cytoplasm where secondary or final envelopment takes place  
62 (6, 7). The cytoplasmic stage of herpesvirus maturation has been particularly  
63 challenging to study because a myriad of host and viral factors contribute to this  
64 process (6, 8). The identity of the cellular membranes that contribute to final virus  
65 envelope has been a topic of several studies (9-11). A further challenge in these studies  
66 has been the possibility of mislocalization of cellular markers during infection. To  
67 elaborate this point, biomarkers that associate with the endoplasmic reticulum (ER) may  
68 not associate with the ER during infection or the ER membranes may form completely  
69 different structures during infection. For human cytomegalovirus (HCMV), elegant 3-  
70 dimensional confocal studies have shown the organization of a virus assembly  
71 compartment (vAC) in the cytoplasm, the site of virus maturation (12, 13). The vAC  
72 consists of several host organelles organized in specific shape and capacity with early  
73 endosomes forming the core of the structure. A similar vAC has been described for  
74 mouse cytomegalovirus (MCMV) infected cells (14). Moreover, endosomal processes  
75 have been implicated in cytoplasmic maturation of several herpesviruses (15-19).  
76 Endocytic motifs in herpes simplex virus (HSV) envelope glycoprotein B (gB) are  
77 required for proper recycling of gB from cell surface to trans-Golgi network during

78 maturation and thereby determine the infectivity of maturing virus (20). Similar endocytic  
79 processes for internalization of pseudorabies virus and CMV gB have also been  
80 reported (21, 22) and there is evidence that endocytic membranes are used for  
81 envelopment of several herpesviruses including HSV, varicella-zoster virus (VZV), and  
82 CMV (10, 13, 17, 23, 24).

83

84 Dynamins and dynamin-related proteins (DRP) constitute a superfamily of large self-  
85 assembling GTPases (an enzyme that can bind and hydrolyze guanosine triphosphate  
86 (GTP)) that mediate membrane fission and fusion in biological processes such as  
87 endocytosis, vesicle trafficking, cell division, organelle division and fusion (25). They are  
88 distinct from the small, Ras-like GTPases due to their oligomerization-dependent  
89 activation, the capacity to interact directly with membrane lipids, and their low GTP  
90 binding activity (26). Dynamins work twice in the mechanism of endocytosis: early in the  
91 constriction of the invaginating vesicle and late in its scission (27). Dynamins are known  
92 to be required for clathrin-mediated endocytosis (28, 29). In mammals,  
93 classical dynamins include dynamins 1, 2 and 3. Dynamin 1 is enriched within the brain  
94 and localizes to presynaptic terminals, dynamin 2 has a ubiquitous tissue distribution,  
95 whereas dynamin 3 is localized in the testis and the brain (25).

96

97 Earlier, we studied the process of HCMV maturation in cells where dynamin-clathrin  
98 pathways were pharmacologically inhibited (30). One of the small molecules, dynasore,  
99 used in this study specifically inhibits dynamin function (31). In the current study, we  
100 utilized the recently established conditional triple dynamin knockout mouse embryonic

101 fibroblasts (TKO) (32) to study the involvement of endocytic pathways in  
102 cytomegalovirus maturation. The use of TKO cells over the drug is preferred because  
103 adverse side effects of the dynamin inhibitor dynasore cannot be entirely ruled out. The  
104 results of this study reveal that dynamin is critical for a late stage of virus maturation.  
105 Studies on dynamin function in herpesvirus infection will help us understand the host-  
106 virus interaction pathways amenable to targeting by conventional small molecules as  
107 well as by newer generation nucleotide-based therapeutics (e.g. siRNA, CRISPR/Cas9  
108 gRNA, etc.). Targeting dynamin with pharmaceutical compounds has already been  
109 shown to have prophylactic potential against several infectious agents (reviewed in  
110 (33)).

111

## 112 **Materials and Methods:**

113

114 **Cells.** Mouse embryonic fibroblasts (MEF) were cultured in Dulbecco's modified Eagle's  
115 medium (DMEM, Cellgro, Manassas, VA) containing 4.5 g/ml glucose, 10% fetal bovine  
116 serum SAFC, Lenexa, KS), 1 mM sodium pyruvate, 2 mM L-glutamine, and 100 U/ml  
117 penicillin-streptomycin (Cellgro, Manassas, VA) at 37°C with 5% CO<sub>2</sub>. The deletion of  
118 dynamin in engineered triple dynamin knockout (TKO) cells is mediated by a tamoxifen  
119 inducible knockout strategy. Briefly, these cells express a Cre-estrogen receptor mutant  
120 knock-in transgene from the ROSA26 locus (34). Thus, Cre is only shuttled into the  
121 nucleus in response to tamoxifen exposure. The TKO cells were treated with 10 µM  
122 stock of 4-hydroxytamoxifen (4-HT, Sigma H-6278) in 100% ethyl alcohol for 2 days and  
123 then media was changed back to normal tamoxifen-free media. Depletion of dynamin

124 was evident at 3-4 days post treatment in western blots (described below) of whole cell  
125 lysates.

126

127 **Antibodies, immunofluorescence assays, and immunoblots.** The mouse anti-  
128 dynamin clone 41 from BD (#610245) was used to probe for dynamin in the Western  
129 blotting. Mouse cytomegalovirus IE1 (m123), m04, m06 and m55 mouse antibodies  
130 (Catalog nos. HR-MCMV-08, HR-MCMV-01, HR-MCMV-02 and HR-MCMV-04) were  
131 purchased from Center for Proteomics, University of Rijeka, and used at 1:1000 dilution.  
132 Golgin-97 rabbit antibody was purchased from Cell Signaling Technology (Catalog No.  
133 13192S) and used at 1:1000 dilution. Fluorescent label tagged secondary antibody  
134 DYLIGHT 594 was purchased from Thermo Scientific Pierce and used at 1:1000 in  
135 immunofluorescent assays (IFA) described below. Hoechst 33258 (Thermo Scientific  
136 Pierce) staining (1:3000 dilution) identified the nuclei in IFA. Anti  $\beta$ -actin antibody (AC-  
137 74, Sigma-Aldrich, St. Louis, MO) was used (1:1000 dilution) as a control for sample  
138 loading in immunoblots (IB). Horseradish peroxidase-labeled anti-mouse IgG, IgM and  
139 anti-Rabbit IgG (Catalog Nos. 31444 and 31460, Thermo Scientific, Rockford, IL) were  
140 used as the secondary antibody at 1:3000 dilutions for IBs. Blots were detected using  
141 ECL Western blotting detection reagents (GE Healthcare, Buckinghamshire, United  
142 Kingdom).

143

144 **Virus.** MCMV strain K181 was grown in MEF cells. Virus stock was prepared in 3X  
145 autoclaved milk, sonicated 3 times and stored at -80°C. During infection, media was  
146 removed from the wells of cell culture plates and appropriately diluted virus stock was

147 absorbed onto the cells in raw DMEM. Cells were incubated for 1 hour with gentle  
148 shaking every 10 mins followed by washing 3X with PBS. Fresh complete medium was  
149 added and cells were incubated until the end point.

150

151 **Cell Viability Assay.** Parental MEF and TKO cells grown on 12 well tissue culture  
152 plates were infected with MCMV-K181 at a multiplicity of infection (MOI) of 3.0 or mock-  
153 infected at confluency. Five hundred  $\mu$ l of fresh complete medium was added to the  
154 wells on day 3 and day 6. At the designated time points, media was removed and cells  
155 were harvested by trypsinization. Cell viability was determined using trypan blue  
156 exclusion on TC20 automated cell counter (BioRad Laboratories, Hercules, CA)  
157 following manufacturer's protocol.

158

159 **Microscopy.** Samples were prepared using established protocols for IFA and confocal  
160 fluorescence microscopy. Briefly, mock induced parental MEF or 4-HT treated TKO  
161 cells were grown on coverslip-inserts in 24 well tissue culture dishes and infected with  
162 an MOI of 3.0 at confluency. At the end point of the experiment, cells were fixed in 3.7%  
163 formaldehyde for 10 min and were incubated in 50 mM  $\text{NH}_4\text{Cl}$  in 1X PBS for 10 min to  
164 reduce autofluorescence. This was followed by washing in 1X PBS, incubation in 0.5%  
165 Triton X-100 for 20 min to permeabilize the cells and finally washing and incubation with  
166 primary and secondary antibodies at 1:1000 dilution in 0.1% bovine serum albumin in  
167 1X PBS. Coverslips were retrieved from the wells and were mounted on glass slides  
168 with a drop of mounting medium (Gel/Mount, Biomed, Foster City, CA) and dried  
169 overnight before imaging. Images were acquired on an inverted Evos-FL microscope



170 (Thermo Fisher Scientific, Waltham, MA) using 100X objective. Samples for  
171 transmission electron microscopy (TEM) were prepared by fixing the cells (MEF) at  
172 endpoint in 2.5% glutaraldehyde in 0.1 M cacodylate buffer (pH 7.2) for 2 h at room  
173 temperature. Cells were then washed with the same buffer and postfixed with buffered  
174 1.0% osmium tetroxide at room temperature for 1 h. Following several washes with  
175 0.1M cacodylate buffer, cells were dehydrated with ethanol, infiltrated, and embedded in  
176 Eponate 12 resin (Ted Pella Inc., Redding, CA). Cell culture plates were cracked with a  
177 hammer to release the resin after it had solidified, and ultrathin sections (60 to 70 nm) of  
178 monolayer cells were cut and counterstained using uranyl acetate and lead citrate.  
179 Examination of ultrathin sections was carried out on a Hitachi H-7500 TEM operated at  
180 75 kV, and images were captured using a Gatan BioScan (Pleasanton, CA) charge-  
181 coupled device camera. The images were acquired and analyzed with the Digital  
182 Micrograph (Pleasanton, CA) software.

183

184 **Drug inhibition assay.** Confluent MEF monolayers were pretreated with dynasore (50  
185  $\mu$ M) (Catalog No. 324410, EMD Millipore Corp., Billerica, MA) for 1 h and infected with  
186 MCMV-K181 in medium containing the drug. Cells were washed with PBS and then  
187 incubated in the presence of the drug until the end of the experiment.

188

189 **Virus titers.** Infected or mock-infected samples were harvested within the medium at  
190 the designated end points and stored at  $-80^{\circ}\text{C}$  before titration. In some experiments,  
191 media and cells were separated by low-speed ( $< 1000 \times g$ ) centrifugation and viral  
192 loads in supernatant and cells were quantified by titering on wild-type MEF. Titers was

193 performed as described earlier (35) with some modifications. In brief, monolayers of  
194 MEF grown in 12 well plates and serial dilutions of sonicated samples were absorbed  
195 onto them for 1 h, followed by 3X washing with PBS. Carboxymethylcellulose (CMC)  
196 (Catalog No. 217274, EMD Millipore Corp., Billerica, MA) overlay with complete DMEM  
197 media (1-part autoclaved CMC and 3 parts media) was added and cells were incubated  
198 for 5 days. At end point, overlay was removed and cells were washed 2X with PBS.  
199 Infected monolayers were fixed in 100% methanol for 7 min, washed once with PBS  
200 and stained with 1% crystal violet (Catalog No. C581-25, Fisher Chemicals, Fair Lawn,  
201 NJ) for 15 min. Plates were finally washed with tap water, air dried and plaques with  
202 clear zone were quantified.

203

## 204 **Results**

205

### 206 **MCMV replicates to low titers in dynamin-depleted fibroblasts**

207 Dynamin was depleted in engineered MEF by treatment with 4-HT for 48 hours (Fig 1A)  
208 leading to the generation of TKO cells as described before (32). Whole cell lysates of  
209 MCMV-K181 infected (+) or mock-infected (-) MEF showed similar levels of dynamin  
210 whereas dynamin was reduced to insignificant levels in TKO cells. Mock-induced  
211 parental MEF and TKO cells were infected with MCMV-K181 at a high (3.0) or low  
212 (0.01) multiplicity of infection (MOI) and monitored for virus growth. Cells were  
213 harvested in the medium at 3- or 6-days post infection and analyzed for plaque forming  
214 units on wild-type MEFs. At 3 days post infection, MCMV titers were reduced about 10-  
215 fold for both low and high MOI infections in TKO cells compared to parental MEF (Fig

216 1B). At 6 days post infection, TKO virus titers were reduced more than 200-fold for low  
217 MOI infections and about 10-fold for high MOI infections (Fig 1B). All of these  
218 differences were statistically significant. Taken together, this data suggest that depletion  
219 of dynamin causes severe growth impairment of MCMV.

220

### 221 **Dynamin depletion interferes with MCMV entry in fibroblasts and affects late** 222 **protein expression**

223 To explore the impact of dynamin on virus entry, parental MEF and TKO cells were  
224 infected with MCMV-K181 at MOI 3 and cell lysates were analyzed for expression of  
225 immediate early (IE1; m123) protein. At 4- and 24 hours post infection (hpi), IE1 was  
226 detected in both MEF and TKO; however, levels of IE1 were significantly reduced in  
227 TKO (Fig 2) indicating that virus entry was affected but not completely eliminated in  
228 TKO cells. Similarly, reduced levels of early protein m06 were detected in TKO  
229 compared to MEF at 24 hpi. Expression levels were detected to be similar in TKO and  
230 MEF for both IE1 and m06 at 48 hpi. In contrast, late viral protein m55 was expressed at  
231 lower levels in TKO cells at 48 hpi. Altogether, these data indicate that MCMV enters  
232 less efficiently in dynamin-depleted fibroblasts but establishes infection, albeit with a  
233 compromised expression of late viral proteins.

234

235 There is a certain possibility that inefficient virus entry in TKO cells, as evidenced by  
236 reduced IE1 expression at early times post infection (Fig. 2), leads to an overall delayed  
237 replication cycle. To probe this further, we performed a full single-step virus growth  
238 curve analysis. Parental MEF and TKO cells were either mock-infected or infected with

239 MCMV-K181 at MOI 3.0 and cells and medium were harvested followed by  
240 quantification of plaque forming units. As summarized in Figure 3A, viral growth defect  
241 in TKO cells was evident as early as 3 days post infection (dpi) and continued up to 7  
242 dpi. We performed a cell viability test of mock and MCMV-K181 infected MEF and TKO  
243 up to 7 dpi in parallel to rule out the possibility that this growth defect could be due to a  
244 viability disadvantage in TKO cells (Fig 3B). Uninfected MEF and TKO cells were >95%  
245 viable until 5 days in cell culture. At 7 days, TKO cells showed more cell death  
246 compared to MEF. During MCMV infection, both TKO and MEF cells showed significant  
247 cell death starting at 1 dpi; however, TKO cells showed more resistance to MCMV  
248 induced cell-death, especially at 3- and 5-days post infection.

249

250 To probe whether the observed growth defect in TKO cells (Fig 3A) reflects a defect in  
251 virus replication or release from cells, we separated cells and supernatants at different  
252 times post infection and evaluated the viral titers (Fig. 4). The results indicate significant  
253 reduction in both cell and supernatant-associated virus in TKO cells at 3 dpi for both low  
254 and high MOI. A similar trend was observed at 6 dpi for low MOI. Interestingly, at high  
255 MOI, the supernatant titers for TKO cells were significantly reduced but cell-associated  
256 titers were equivalent to MEF cells at 6 dpi. In summary, the data corroborate the  
257 results from growth analysis (Fig 1, 3) and protein expression studies (Fig 2) that virus  
258 growth is delayed in TKO cells; however, it also indicates that virus growth in TKO cells  
259 catches up with WT-MEF at late time post infection and the growth defect observed at  
260 this time is almost entirely due to a defect in virus release.

261

262 **Lack of dynamin does not impair the localization of early and late viral proteins**

263 In order to understand the impact of dynamin depletion on virus protein trafficking, we  
264 examined the localization of MCMV early and late proteins in MEF and TKO cells at 48  
265 hpi by immunofluorescence assay (IFA). MCMV immediate early (IE1; m123) protein  
266 was expressed and localized to the nucleus in both parental MEF and TKO cells (Fig 5,  
267 top 2 panels). MCMV early (m04) protein was expressed in the cytoplasm but  
268 concentrated around the nuclear periphery in both cell types (Fig 5, middle 2 panels).  
269 Similarly, MCMV late (m55) protein was expressed in the cytoplasm of both cells in  
270 diffuse as well as punctate (possibly virion associated) forms (Fig 5, bottom 2 panels).  
271 Collectively, these data indicate that dynamin-depletion does not affect the expression  
272 and localization of early to late viral proteins that is evident in IFA.

273

274 **Lack of dynamin affects the formation of vAC**

275 vAC is known to be the site of cytoplasmic virus maturation. Since the growth data (Fig  
276 4) showed a defect in virus release at late times post infection, we investigated the  
277 formation of vAC in TKO and MEF cells to analyze any defects that would translate to a  
278 defect in virus envelopment and release. Mock-infected MEF showed the presence of  
279 perinuclear Golgin-97 staining, consistent with the presence of Golgi-stacks (36) (Fig 6).  
280 Similar perinuclear Golgin-97 staining was also observed in mock-infected TKO cells.  
281 Infected MEF showed a perinuclear Golgin-97 ring formation, as observed in HCMV  
282 infected fibroblasts and marks the vAC (12, 37). In infected TKO cells, the Golgin-97  
283 accumulated in the perinuclear region but none of the cells examined (>100) showed  
284 the typical ring formation. Thus, the data indicate that assembly of vAC is compromised

285 in TKO cells.

286

287 **MCMV nuclear stages are intact in dynamin-depleted fibroblasts but cytoplasmic**  
288 **virus maturation is significantly impaired**

289 Parental MEF and TKO cells were infected with MCMV-K181 at an MOI of 3.0. At 72  
290 hours post infection, cells were fixed for processing and imaging under transmission  
291 electron microscope. Both cell types showed typical infected cells morphology with a  
292 kidney-bean shaped nucleus and the presence of nuclear and cytoplasmic inclusions  
293 (Fig 7A, E). The nucleus of both MEF and TKO cells contained all three types of capsids  
294 (A (empty), B (scaffold-containing) and C (DNA-containing)) reported for herpesviruses  
295 (Fig 7B, F) (8). Quantification of these capsid types revealed similar proportions in both  
296 cell types (Fig 7I) indicating intact nucleocapsid maturation. In contrast, very few virus  
297 particles were observed in the cytoplasm of TKO cells (Fig 7G, H); however, these  
298 particles contained genomic DNA and presence of tegument proteins could be  
299 appreciated on the surface of these capsids (Fig 7G inset). Virus envelopment was not  
300 evident in TKO cells. Several enveloping (Fig 7C inset) or enveloped virus particles  
301 were present in the cytoplasm of parental MEF (Fig 7C, D). Another striking difference  
302 was the presence of intact Golgi stacks in TKO cells (Fig 7 G, H), which were  
303 fragmented to different degrees in MEF cells (Fig 7 C, D) indicating increased  
304 vesiculation. Examination of cytoplasm revealed no virions or partially enveloped  
305 particles in TKO cells (Fig 7 G, H, J) in contrast to significant number of virions and  
306 enveloping particles in the parental MEF (Fig. 7 C, D, J). In summary, the data indicate  
307 that cytoplasmic maturation is severely compromised in TKO cells.

308

### 309 **Dynasore-treated cells mimic the dynamin knockout phenotype**

310 To rule out any unknown peculiarity in TKO cells that may be responsible for the virus  
311 maturation defects evident in these cells, we treated wild-type primary MEF with 50  $\mu$ M  
312 of an established dynamin inhibitor (dynasore) and subsequently infected with MCMV-  
313 K181 to study virus entry and growth. Dynasore is a small molecule that is well  
314 established to specifically abolish dynamin activity in cells without an impact on cell  
315 viability (31). Dynasore-treatment resulted in a decrease in IE1 gene expression at 4  
316 hours post infection but this expression was normalized at 48 hours post infection (Fig  
317 8A) similar to the results obtained for TKO cells (Fig 2). Analysis of virus growth at low  
318 (0.05) and high (3.0) MOI indicated significant differences between dynasore-treated  
319 and mock-treated cells (Fig 8B). These results also correlate with the results obtained  
320 for TKO cells (Fig 1, 3). Thus, the phenotype we observed in TKO cells is indeed due to  
321 the deficiency of dynamin function and is not an aberrant effect of dynamin depletion on  
322 a single cell type.

323

### 324 **Discussion**

325

326 Endosomal membranes have been implicated in herpesvirus maturation; however, the  
327 role of specific endocytic pathways in herpesvirus morphogenesis remains largely  
328 unexplored. In the current work, we show that dynamin-mediated endocytic pathways  
329 are important for CMV maturation. We utilized recently characterized triple dynamin  
330 knockout cells for these studies to provide convincing evidence that these pathways are

331 important at a late stage of CMV life cycle that involves virus morphogenesis, gain of  
332 infectivity and egress of mature particles.

333         The current studies were influenced by our earlier studies on HCMV where we  
334 utilized laboratory strains that utilize a glycoprotein-mediated fusion mechanism at  
335 plasma membrane to enter the cells instead of endocytosis (30). The HCMV entry  
336 pathways in different cells types have been studied in detail and it is well known that  
337 laboratory strains enter the cells via a pH-independent fusion mechanism at the plasma  
338 membrane (38, 39). We used clathrin and dynamin inhibitors in the above study to  
339 reveal a role of endocytic processes on HCMV maturation. The data from these studies  
340 indicated an impact of pharmacological inhibition of dynamin-clathrin pathways on  
341 HCMV maturation; however, virus entry and early gene expression remained intact. To  
342 be able to extend the study of virus biology in an appropriate animal model, we utilized  
343 an established dynamin-knockout mouse cell model that has been extensively  
344 characterized (32, 40, 41) and is free from any side-effects that chemical inhibitors may  
345 have on cells. It also provides the ability to test MCMV instead of HCMV, which would  
346 be useful for future *in vivo* studies looking to characterize the effect of endocytic  
347 inhibitors in a mouse model of CMV infection. This is important because dynamin  
348 inhibitors have already shown a therapeutic potential against several infectious agents  
349 (reviewed in (33)).

350         After successfully establishing a near-complete depletion of dynamin in TKO  
351 cells, we measured its impact on MCMV growth and yield. Dynamin depletion had  
352 significant impact on virus growth at low as well as high multiplicity of infection. Although  
353 analysis of early viral gene expression revealed an impact on early time of infection (4 h



354 and 24h), these differences were normalized by 48 h indicating that the reduction in  
355 virus growth in TKO cells observed at late times post infection is unlikely due to defects  
356 in virus entry or early gene expression. To further investigate this point, we analyzed the  
357 expression and distribution of early to late viral proteins in infected cells. Expression of  
358 early proteins (IE1, m06) was at equivalent levels at 48 hpi; however, the late protein  
359 (m55) expression was significantly reduced indicating that the defects in CMV  
360 replication in dynamin depleted cells relate to late steps in virus replication that include  
361 the expression of late genes. Localization of viral proteins (IE1, m04 and m55) in TKO  
362 cells was not significantly different from parental MEF. These results rule out the  
363 possibility that virus growth defects could be due to an impact on early viral gene  
364 expression or abnormal localization of major viral proteins in dynamin depleted cells.  
365 Investigation of cellular protein (Golgin97) localization revealed that vAC does not form  
366 properly in TKO cells; therefore, cytoplasmic virus maturation and egress are likely  
367 impaired.

368         The possibility of a defect at a late stage of virus maturation was analyzed by  
369 ultrastructural detailed analysis of infected cells. Nuclear stages of virus replication  
370 including capsid assembly and DNA packaging were intact based on the numbers and  
371 types of capsid particles present in the nuclei of TKO versus parental MEF. Equivalent  
372 proportions of A, B and C capsid forms (8) were observed in both cell types (Fig 7I).  
373 Most importantly, the presence of similar numbers of C-capsids (DNA packaged  
374 capsids) in two cell types indicate that dynamin did not influence the stages of virus  
375 replication up to the point of production of DNA packaged capsids, which go on to  
376 become infectious virions. Thus, the defects would either be at the nuclear egress of

377 packaged capsids or at the cytoplasmic stage of virus maturation and egress. Further, a  
378 block at nuclear egress was ruled out on the basis of the absence of any large buildup  
379 of assembled particles at the inner nuclear membrane in ultrastructural images (Fig 7E,  
380 F). Moreover, a few virus particles were present in the cytoplasm of TKO cells indicating  
381 that nuclear egress could not be completely blocked. These cytoplasmic virus particles  
382 in TKO cells were mostly unenveloped (Fig 7G) or appeared to be morphologically  
383 abnormal/degrading (Fig 7H, arrowhead). This is not unusual since an absence of an  
384 envelope would ultimately lead to degradation of naked virus particles in the cytoplasm.  
385 We saw a similar phenotype of capsids degrading in the cytoplasm of pp150 mutant  
386 virus infected cells in our earlier study (37). This degradation happened despite the re-  
387 localization of viral DNA from the nucleus to the cytoplasm (42). Since viral DNA cannot  
388 exit the nucleus independent of virus capsids (and even if it did, it would degrade rapidly  
389 due to strong cytoplasmic nucleases), the most convincing explanation is that capsids  
390 carry viral DNA to the cytoplasm but are unable to maintain their integrity in the absence  
391 of essential inner tegument proteins.

392 Exocytic vesicles and vesicles containing clathrin-coated pits are generated from  
393 Golgi fragmentation. Anti-dynamin antibodies have been shown to block the formation  
394 of these vesicles in a cell-free assay (43). This vesiculation is restored upon addition of  
395 purified dynamin. Thus, it comes as no surprise that dynamin depleted cells have more  
396 intact Golgi stacks compared to parental cells when infected by CMV. This vesiculation  
397 may contribute significantly to CMV envelopment, which is compromised in dynamin-  
398 depleted cells. The late virus maturation defect observed in the current study, along with

399 an evident disruption of vAC formation point towards the important role of dynamin-  
400 mediated vesicular pathways in CMV maturation (Fig 9).

401         There is little doubt that endosomal systems contribute to the process of  
402 herpesvirus maturation; however, examples of specific virus proteins hijacking host  
403 endocytic machinery are lacking. A study based on mass spectroscopic analysis of  
404 protein interactions in HCMV-infected cells indicated that the tegument protein pp150  
405 directly interacts with clathrin (44). pp150 has established roles in virus maturation (37)  
406 and it is certainly possible that this pp150-clathrin interaction is functional during virus  
407 maturation and egress. More specific interactions of herpesvirus proteins with endocytic  
408 systems are likely to be revealed by studying host factors such as dynamin that are  
409 important in the late stages of herpesvirus maturation.

410

#### 411 **Acknowledgments.**

412

413 We are thankful to Pietro De Camilli at Yale University for the gift of triple dynamin-  
414 knockout (TKO) cells. Hong Yi at the Robert P. Apkarian Integrated Electron Microscopy  
415 Core at Emory University acquired the electron microscopy data. The research was  
416 supported by American Heart Association Scientist Development Grant (Award  
417 14SDG20390009, PI: Tandon).

418

#### 419 **Author Contributions.**

420

421 RT designed the experiments; MHH, LED, RPM and RT performed the experiments and  
422 analyzed the data; RKB and DM helped with virus growth assays and plaque counting.  
423 RT wrote and edited the manuscript.

424 **References**

425

426 1. **Mercer J, Schelhaas M, Helenius A.** 2010. Virus entry by endocytosis. *Annu*  
427 *Rev Biochem* **79**:803-833.

428 2. **Schelhaas M.** 2010. Come in and take your coat off - how host cells provide  
429 endocytosis for virus entry. *Cell Microbiol* **12**:1378-1388.

430 3. **Sun Y, Tien P.** 2013. From endocytosis to membrane fusion: emerging roles of  
431 dynamin in virus entry. *Crit Rev Microbiol* **39**:166-179.

432 4. **Humphries AC, Way M.** 2013. The non-canonical roles of clathrin and actin in  
433 pathogen internalization, egress and spread. *Nat Rev Microbiol* **11**:551-560.

434 5. **Blanchard E, Belouzard S, Goueslain L, Wakita T, Dubuisson J, Wychowski**  
435 **C, Rouille Y.** 2006. Hepatitis C virus entry depends on clathrin-mediated  
436 endocytosis. *J Virol* **80**:6964-6972.

437 6. **Mocarski ES, Jr., Shenk, T., Pass R. F.** 2006. Cytomegaloviruses., p. 2701-  
438 2772. In D M Knipe and P M Howley (ed), *Fields Virology 5th Edition* Lippincott  
439 Williams & Wilkins, Philadelphia.

440 7. **Hellberg T, Passvogel L, Schulz KS, Klupp BG, Mettenleiter TC.** 2016.  
441 Nuclear Egress of Herpesviruses: The Prototypic Vesicular Nucleocytoplasmic  
442 Transport. *Adv Virus Res* **94**:81-140.

443 8. **Tandon R, Mocarski ES.** 2012. Viral and host control of cytomegalovirus  
444 maturation. *Trends Microbiol* **20**:392-401.

445 9. **Henaff D, Radtke K, Lippe R.** 2012. Herpesviruses exploit several host  
446 compartments for envelopment. *Traffic* **13**:1443-1449.

- 447 10. **Buckingham EM, Jarosinski KW, Jackson W, Carpenter JE, Grose C.** 2016.  
448 Exocytosis of Varicella-Zoster Virus Virions Involves a Convergence of  
449 Endosomal and Autophagy Pathways. *J Virol* **90**:8673-8685.
- 450 11. **Owen DJ, Crump CM, Graham SC.** 2015. Tegument Assembly and Secondary  
451 Envelopment of Alphaherpesviruses. *Viruses* **7**:5084-5114.
- 452 12. **Das S, Vasanji A, Pellett PE.** 2007. Three-dimensional structure of the human  
453 cytomegalovirus cytoplasmic virion assembly complex includes a reoriented  
454 secretory apparatus. *J Virol* **81**:11861-11869.
- 455 13. **Das S, Pellett PE.** 2011. Spatial relationships between markers for secretory and  
456 endosomal machinery in human cytomegalovirus-infected cells versus those in  
457 uninfected cells. *J Virol* **85**:5864-5879.
- 458 14. **Karleusa L, Mahmutefendic H, Tomas MI, Zagorac GB, Lucin P.** 2017.  
459 Landmarks of endosomal remodeling in the early phase of cytomegalovirus  
460 infection. *Virology* **515**:108-122.
- 461 15. **Tandon R, AuCoin DP, Mocarski ES.** 2009. Human cytomegalovirus exploits  
462 ESCRT machinery in the process of virion maturation. *J Virol* **83**:10797-10807.
- 463 16. **Chiu YF, Sugden B, Chang PJ, Chen LW, Lin YJ, Lan YC, Lai CH, Liou JY,**  
464 **Liu ST, Hung CH.** 2012. Characterization and intracellular trafficking of Epstein-  
465 Barr virus BBLF1, a protein involved in virion maturation. *J Virol* **86**:9647-9655.
- 466 17. **Crump CM, Yates C, Minson T.** 2007. Herpes simplex virus type 1 cytoplasmic  
467 envelopment requires functional Vps4. *J Virol* **81**:7380-7387.

- 468 18. **Brunetti CR, Dingwell KS, Wale C, Graham FL, Johnson DC.** 1998. Herpes  
469 simplex virus gD and virions accumulate in endosomes by mannose 6-  
470 phosphate-dependent and -independent mechanisms. *J Virol* **72**:3330-3339.
- 471 19. **Tooze J, Hollinshead M, Reis B, Radsak K, Kern H.** 1993. Progeny vaccinia  
472 and human cytomegalovirus particles utilize early endosomal cisternae for their  
473 envelopes. *Eur J Cell Biol* **60**:163-178.
- 474 20. **Beitia Ortiz de Zarate I, Kaelin K, Rozenberg F.** 2004. Effects of mutations in  
475 the cytoplasmic domain of herpes simplex virus type 1 glycoprotein B on  
476 intracellular transport and infectivity. *J Virol* **78**:1540-1551.
- 477 21. **Van Minnebruggen G, Favoreel HW, Nauwynck HJ.** 2004. Internalization of  
478 pseudorabies virus glycoprotein B is mediated by an interaction between the  
479 YQRL motif in its cytoplasmic domain and the clathrin-associated AP-2 adaptor  
480 complex. *J Virol* **78**:8852-8859.
- 481 22. **Tugizov S, Maidji E, Xiao J, Pereira L.** 1999. An acidic cluster in the cytosolic  
482 domain of human cytomegalovirus glycoprotein B is a signal for endocytosis from  
483 the plasma membrane. *J Virol* **73**:8677-8688.
- 484 23. **Hollinshead M, Johns HL, Sayers CL, Gonzalez-Lopez C, Smith GL, Elliott**  
485 **G.** 2012. Endocytic tubules regulated by Rab GTPases 5 and 11 are used for  
486 envelopment of herpes simplex virus. *EMBO J* **31**:4204-4220.
- 487 24. **Schauflinger M, Fischer D, Schreiber A, Chevillotte M, Walther P, Mertens T,**  
488 **von Einem J.** 2011. The tegument protein UL71 of human cytomegalovirus is  
489 involved in late envelopment and affects multivesicular bodies. *J Virol* **85**:3821-  
490 3832.

- 491 25. **Praefcke GJ, McMahon HT.** 2004. The dynamin superfamily: universal  
492 membrane tubulation and fission molecules? *Nat Rev Mol Cell Biol* **5**:133-147.
- 493 26. **Pigino G, Morfini GA, Brady TS.** 2012. Intracellular Trafficking. *Basic*  
494 *Neurochemistry* (Eighth Edition):119-145.
- 495 27. **Anggono V, Robinson PJ.** 2009. Dynamin. *Encyclopedia of Neuroscience*:725-  
496 735.
- 497 28. **Kirchhausen T.** 1998. Vesicle formation: dynamic dynamin lives up to its name.  
498 *Curr Biol* **8**:R792-794.
- 499 29. **Mettlen M, Pucadyil T, Ramachandran R, Schmid SL.** 2009. Dissecting  
500 dynamin's role in clathrin-mediated endocytosis. *Biochem Soc Trans* **37**:1022-  
501 1026.
- 502 30. **Archer MA, Brechtel TM, Davis LE, Parmar RC, Hasan MH, Tandon R.** 2017.  
503 Inhibition of endocytic pathways impacts cytomegalovirus maturation. *Sci Rep*  
504 **7**:46069.
- 505 31. **Macia E, Ehrlich M, Massol R, Boucrot E, Brunner C, Kirchhausen T.** 2006.  
506 Dynasore, a cell-permeable inhibitor of dynamin. *Dev Cell* **10**:839-850.
- 507 32. **Park RJ, Shen H, Liu L, Liu X, Ferguson SM, De Camilli P.** 2013. Dynamin  
508 triple knockout cells reveal off target effects of commonly used dynamin  
509 inhibitors. *J Cell Sci* **126**:5305-5312.
- 510 33. **Harper CB, Popoff MR, McCluskey A, Robinson PJ, Meunier FA.** 2013.  
511 Targeting membrane trafficking in infection prophylaxis: dynamin inhibitors.  
512 *Trends Cell Biol* **23**:90-101.



- 513 34. **Badea TC, Wang Y, Nathans J.** 2003. A noninvasive genetic/pharmacologic  
514 strategy for visualizing cell morphology and clonal relationships in the mouse. *J*  
515 *Neurosci* **23**:2314-2322.
- 516 35. **Zurbach KA, Moghbeli T, Snyder CM.** 2014. Resolving the titer of murine  
517 cytomegalovirus by plaque assay using the M2-10B4 cell line and a low viscosity  
518 overlay. *Viol J* **11**:71.
- 519 36. **Bardin S, Miserey-Lenkei S, Hurbain I, Garcia-Castillo D, Raposo G, Goud**  
520 **B.** 2015. Phenotypic characterisation of RAB6A knockout mouse embryonic  
521 fibroblasts. *Biol Cell* **107**:427-439.
- 522 37. **Tandon R, Mocarski ES.** 2008. Control of cytoplasmic maturation events by  
523 cytomegalovirus tegument protein pp150. *J Virol* **82**:9433-9444.
- 524 38. **Vanarsdall AL, Johnson DC.** 2012. Human cytomegalovirus entry into cells.  
525 *Curr Opin Virol* **2**:37-42.
- 526 39. **Ryckman BJ, Jarvis MA, Drummond DD, Nelson JA, Johnson DC.** 2006.  
527 Human cytomegalovirus entry into epithelial and endothelial cells depends on  
528 genes UL128 to UL150 and occurs by endocytosis and low-pH fusion. *J Virol*  
529 **80**:710-722.
- 530 40. **Shen H, Ferguson SM, Dephoure N, Park R, Yang Y, Volpicelli-Daley L, Gygi**  
531 **S, Schlessinger J, De Camilli P.** 2011. Constitutive activated Cdc42-associated  
532 kinase (Ack) phosphorylation at arrested endocytic clathrin-coated pits of cells  
533 that lack dynamin. *Mol Biol Cell* **22**:493-502.
- 534 41. **Antony B, Burd C, De Camilli P, Chen E, Daumke O, Faelber K, Ford M,**  
535 **Frolov VA, Frost A, Hinshaw JE, Kirchhausen T, Kozlov MM, Lenz M, Low**

- 536           **HH, McMahon H, Merrifield C, Pollard TD, Robinson PJ, Roux A, Schmid S.**  
537           2016. Membrane fission by dynamin: what we know and what we need to know.  
538           EMBO J **35**:2270-2284.
- 539   42.   **AuCoin DP, Smith GB, Meiering CD, Mocarski ES.** 2006. Betaherpesvirus-  
540           conserved cytomegalovirus tegument protein ppUL32 (pp150) controls  
541           cytoplasmic events during virion maturation. J Virol **80**:8199-8210.
- 542   43.   **Jones SM, Howell KE, Henley JR, Cao H, McNiven MA.** 1998. Role of  
543           dynamin in the formation of transport vesicles from the trans-Golgi network.  
544           Science **279**:573-577.
- 545   44.   **Moorman NJ, Sharon-Friling R, Shenk T, Cristea IM.** 2010. A targeted spatial-  
546           temporal proteomics approach implicates multiple cellular trafficking pathways in  
547           human cytomegalovirus virion maturation. Mol Cell Proteomics **9**:851-860.  
548

549 **Figure 1. Dynamin depletion impacts the growth of MCMV in fibroblasts.** Dynamin  
550 was depleted in engineered mouse embryonic fibroblasts (MEF) by a tamoxifen (4-  
551 hydroxytamoxifen; 4-HT) inducible knockout strategy leading to the generation of triple  
552 dynamin knockout (TKO) cells as described earlier (32). MEFs were treated with 4-HT  
553 for 2 days and then 4-HT containing media was replaced with fresh 4-HT-free media  
554 and cells were incubated for additional 2 days. A) Parental MEF and TKO cells were  
555 infected with MCMV K181 strain at MOI 3.0 (+) or mock-infected (-) and cell lysates  
556 were harvested at 4 hours post infection for immunoblot probing for dynamin.  $\beta$ -actin  
557 was used as a loading control. B) Parental MEF and TKO cells were infected with  
558 MCMV-K181 strain at MOI 3.0 or 0.01 and cells with media were harvested at three- or  
559 six-days post infection before plating for virus titers on wild type MEFs. Triplicate  
560 samples were used in experiments. A two-tailed unpaired t-test with Welch's correction  
561 (unequal variance assumption) was used for statistical analysis of differences. P Values  
562 <0.05 were considered significant (\*). dpi: days post infection.

563

564 **Figure 2. Dynamin depletion reduces the entry of MCMV in fibroblasts and**  
565 **interferes with late protein expression.** Parental MEFs and TKO cells were infected  
566 with MCMV-K181 at MOI 3.0 (+) or mock-infected (-). Cells were harvested at 4 h, 24h  
567 and 48 h post infection and probed for immediate early (IE1; m123), early (m06), and  
568 late (m55) viral proteins.  $\beta$ -actin served as loading control. hpi: hours post infection.

569

570 **Figure 3. Impact of dynamin depletion on MCMV growth and cell viability.** A)  
571 Parental MEF and TKO cells were infected with MCMV-K181 at MOI 3.0 and cells with

572 media were harvested at zero to 7 days post infection followed by estimation of virus  
573 titers on wild type MEFs. B) Parental MEF and TKO cells were infected with MCMV-  
574 K181 at MOI 3.0 (+) or mock-infected (-) and cell viability at the indicated time points  
575 was determined by trypan blue exclusion assay. Triplicate samples were used in  
576 experiments. A two-tailed unpaired t-test with Welch's correction (unequal variance  
577 assumption) was used for statistical analysis of differences. P Values <0.05 were  
578 considered significant (\*).

579

580 **Figure 4. Dynamin depletion reduces both cell-associated cell-free virus levels.**

581 Parental MEF and TKO cells were infected with MCMV-K181 at MOI 3.0 or 0.01 and  
582 cells with media were harvested at three- or six-days post infection. Media and cells  
583 were separated by low-speed centrifugation and viral loads in supernatant (S) and cells  
584 (C) were quantified by titering on wild-type MEF. Triplicate samples were used in  
585 experiments. A two-tailed unpaired t-test with Welch's correction (unequal variance  
586 assumption) was used for statistical analysis of differences. P Values <0.05 were  
587 considered significant (\*).

588

589 **Figure 5. Dynamin depletion does not affect the localization of early and late viral**

590 **proteins in infected cells.** Parental MEF and TKO cells were infected with MCMV-  
591 K181 at MOI 3.0, fixed for IFA at 48 hours post infection and stained for MCMV  
592 immediate early (IE1; m123), early (m04), and late (m55) proteins. MCMV proteins  
593 labeled as green (left column), DNA (in nuclei) detected by Hoechst (middle column)  
594 and composite images (overlay, right column) from the same field of each panel are

595 shown. IE1 protein localized to the nuclear compartment whereas m04 and m55  
596 proteins localized to the cytoplasm concentrating at the periphery of the nucleus in both  
597 MEF and TKO cells.

598

599 **Figure 6. Formation of vAC is compromised in dynamin depleted cells.** Parental  
600 MEF and TKO cells were mock-infected or infected with MCMV-K181 at MOI 3.0, fixed  
601 for IFA at 48 hours post infection and stained for Golgin-97. Golgin-97 labeled as green  
602 (left column), DNA (in nuclei) detected by Hoechst (middle column) and composite  
603 images (overlay, right column) from the same field of each panel are shown.

604

605 **Figure 7. MCMV nuclear stages are intact in TKO cells but cytoplasmic virus**  
606 **maturation is significantly impaired.** Transmission electron micrographs (TEM) of  
607 MEF (A-D) and TKO (E-H) cells infected with MCMV-K181. Cells were infected at an  
608 MOI of 3.0 and fixed for processing at 3 days post infection. (A and E) A single infected  
609 cell showing nucleus as well as cytoplasm. (B and F) Infected cell nucleus illustrating A-  
610 (black arrows), B- (black arrowheads), and C- (white triangular arrows) capsids. (C, D,  
611 G and H) Cytoplasmic section illustrating DNA containing capsids (black arrowheads),  
612 partially enveloped/enveloping capsids (white arrows) and virus-like particles that are  
613 difficult to type morphologically (black arrow). The inset in C magnifies and illustrates a  
614 partially enveloped virion and the inset in G illustrates non-enveloped DNA containing  
615 capsids that appear to have some intact tegument. Intact Golgi stacks can be  
616 appreciated in G and H, whereas fragmented Golgi is prominent in C and D. I) Nuclear  
617 capsids were quantified in MEF (n=6) and TKO (n=7) cells. Representative of each type

618 of capsid is shown under the graph. J) MCMV particles in the cytoplasm of MEF (n=8)  
619 and TKO (n=7) cells were quantified. A representative example of virion, partially  
620 enveloped particle and irregular particle is shown under the graph. A two-tailed unpaired  
621 t-test with Welch's correction (unequal variance assumption) was used for statistical  
622 analysis of differences. P Values <0.05 were considered significant (\*).

623

624 **Figure 8. Dynasore-treated MEFs allow virus entry and gene expression but**  
625 **compromise virus growth.** A) MEF were treated with dynasore (50  $\mu$ M) or mock  
626 (DMSO) and infected with MCMV-K181 at an MOI of 3.0. Cell lysates were harvested at  
627 4 h and 48 h post infection for immunoblot probing for MCMV IE1 protein.  $\beta$ -actin was  
628 used as a loading control. B) Dynasore or mock treated cells were infected with MCMV-  
629 K181 at MOI 0.05 or 3.0 and cells were harvested at three- or six-days post infection  
630 before plating for virus titers on wild type MEFs. Triplicate samples were used in  
631 experiments. A two-tailed unpaired t-test with Welch's correction (unequal variance  
632 assumption) was used for statistical analysis of differences. P Values <0.05 were  
633 considered significant. hpi: hours post infection, dpi: days post infection.

634

635 **Figure 9. Proposed model for the functions of dynamin in CMV-infected cells.** A)  
636 Dynamin plays a role in membrane remodeling at different stages of endosomal  
637 trafficking. Newly synthesized proteins in the ER are sorted in the TGN targeted for their  
638 final destination in the cell or secreted forms. TGN also receives input from the  
639 endocytic pathways (broken arrows) where dynamin is implicated. B) Proposed model  
640 of function of dynamin in a CMV-infected cell. Proposed point of critical activity of

641 dynamin is marked with an asterisk. ER: endoplasmic reticulum, TGN: trans-Golgi  
642 network, NC: Nuclear capsid, vAC: Virus assembly complex.

A.

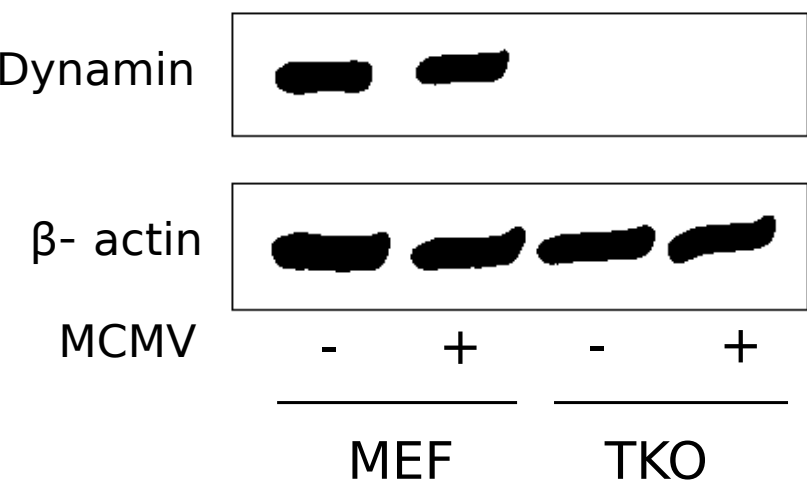

B.

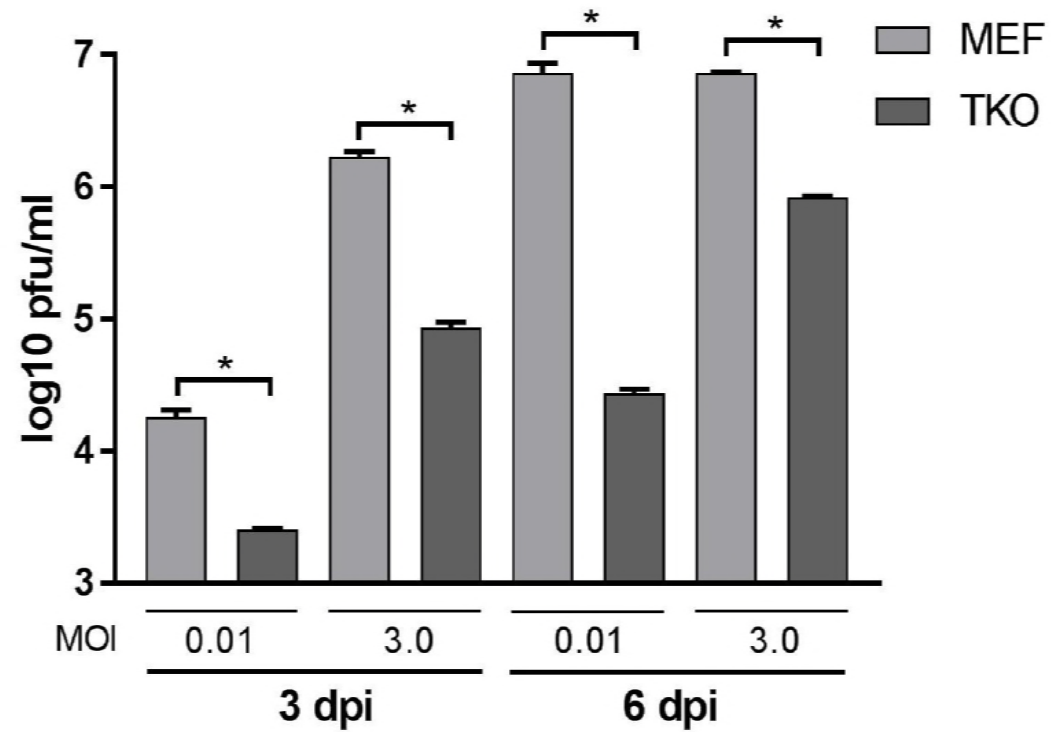





A.

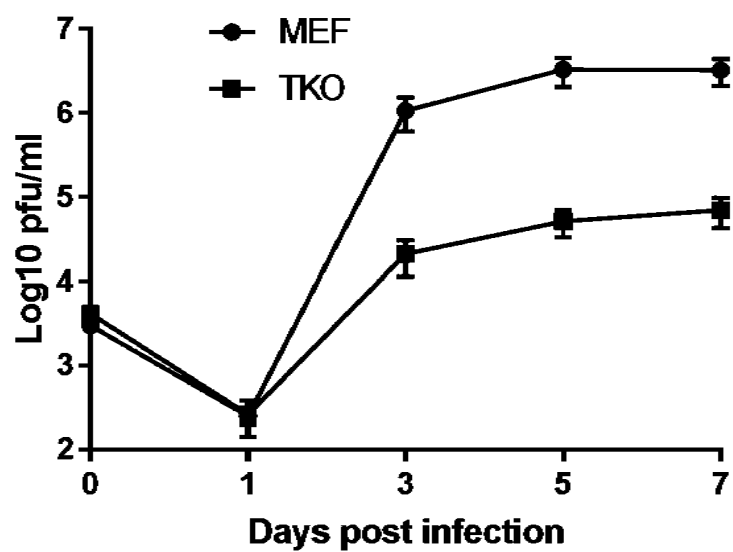

B.

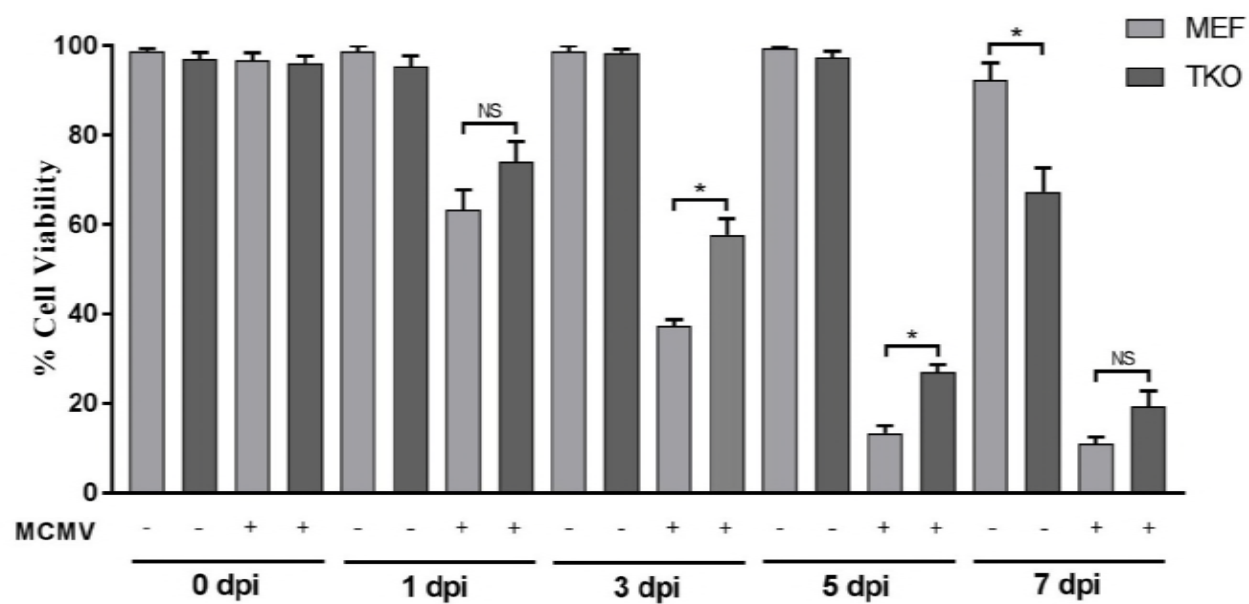

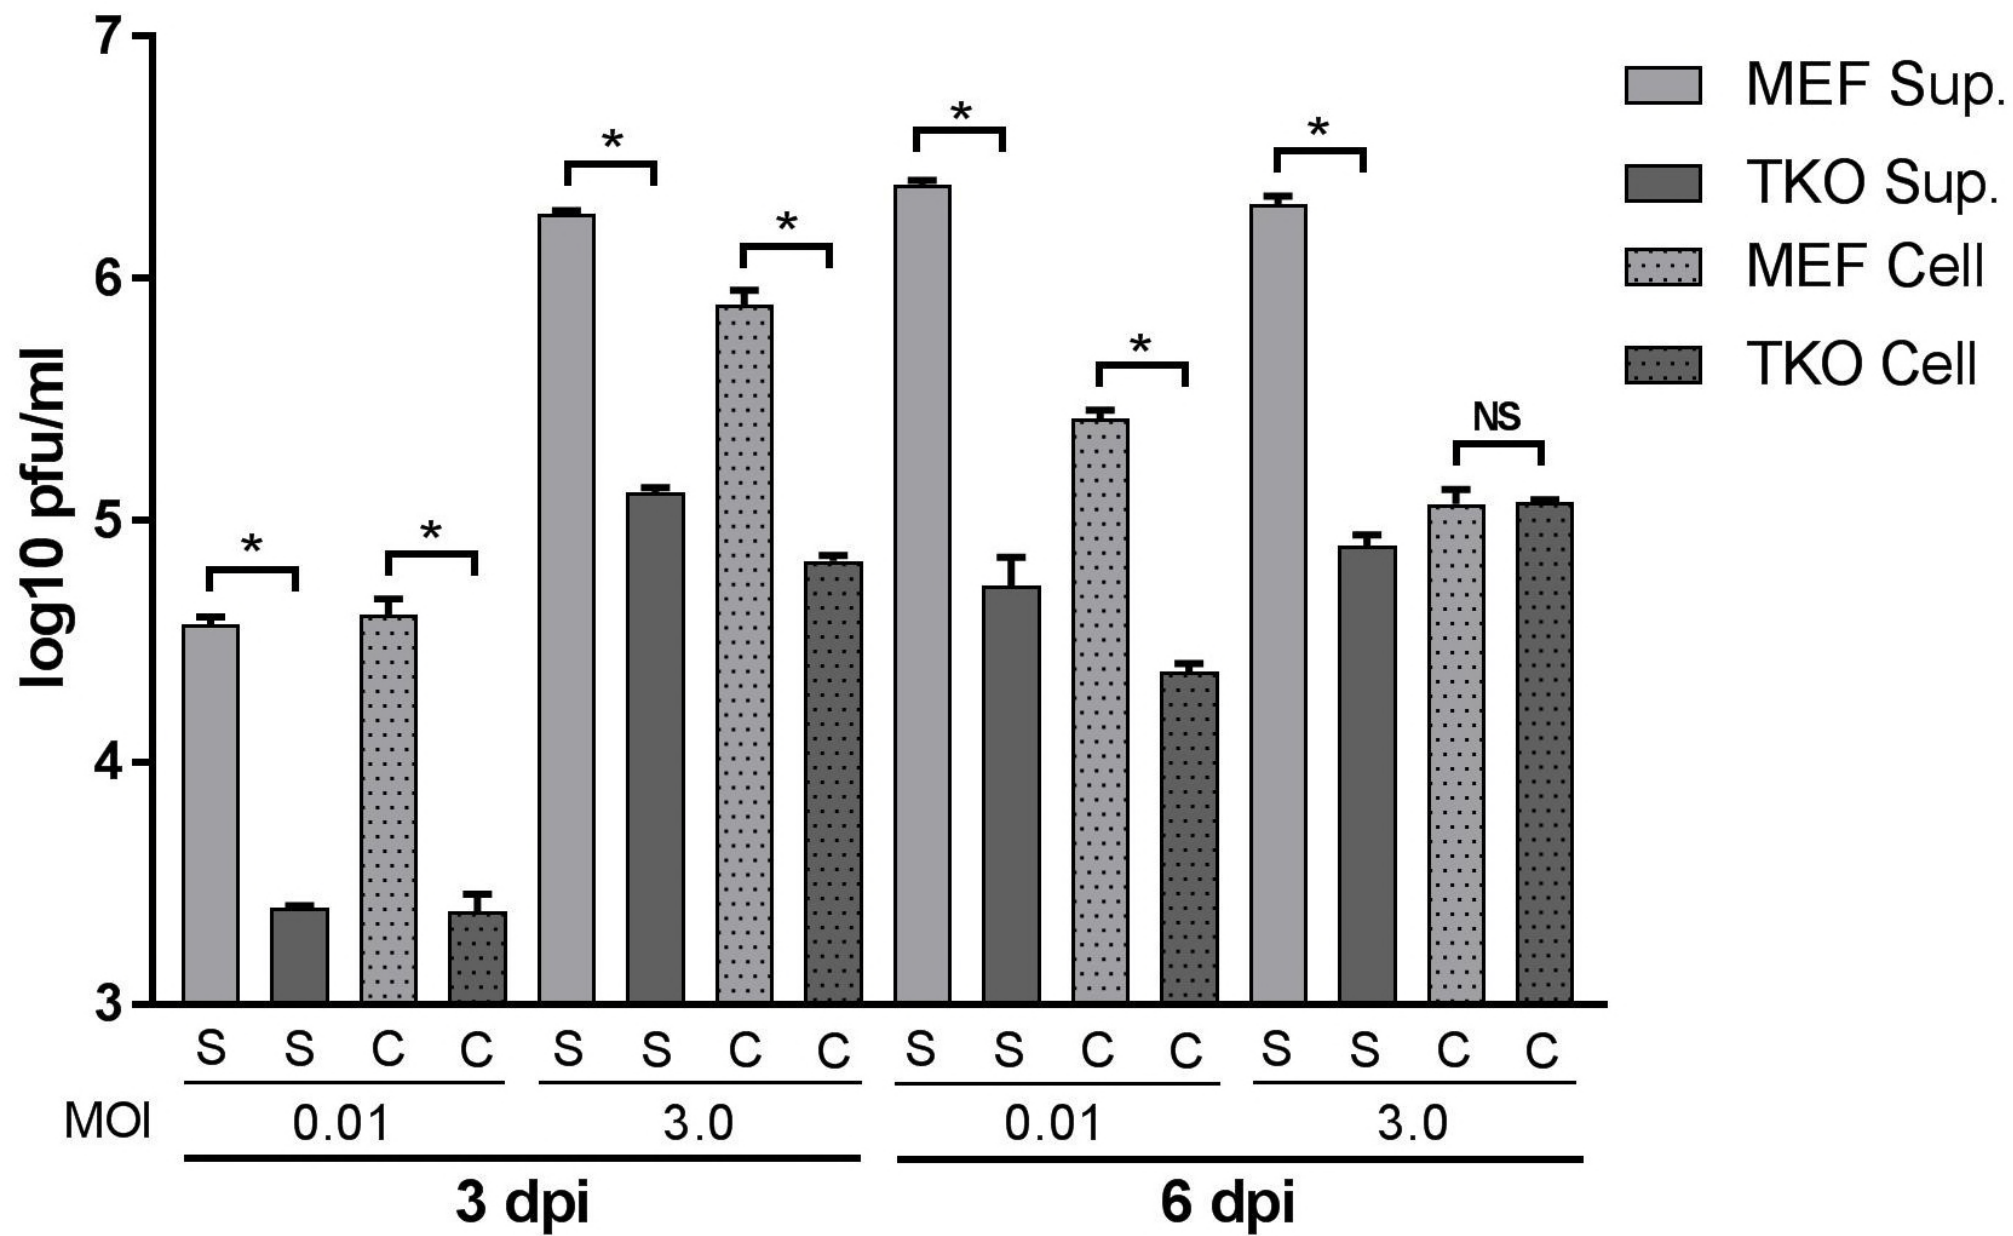

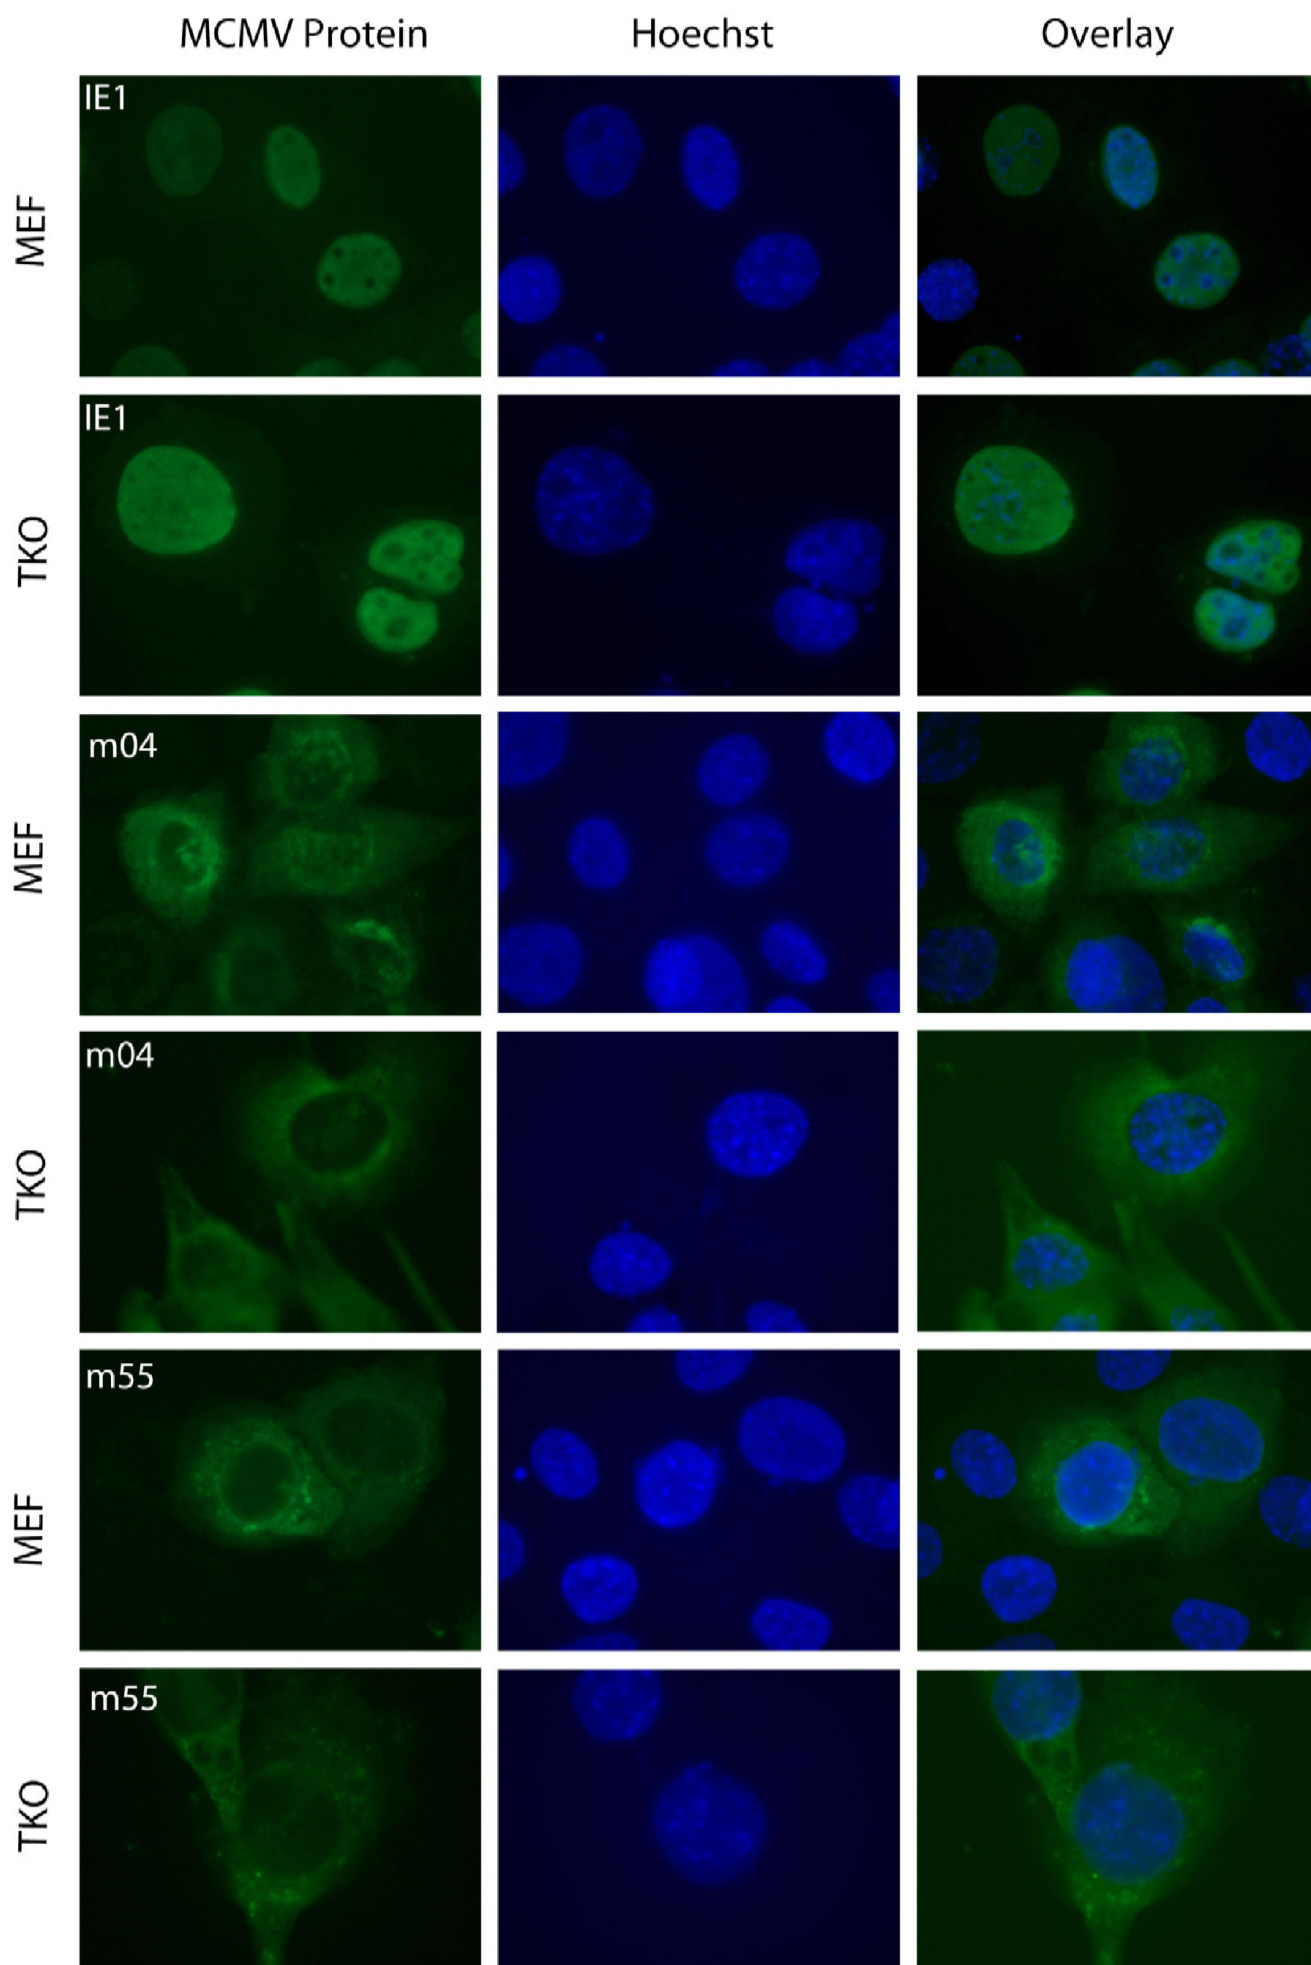

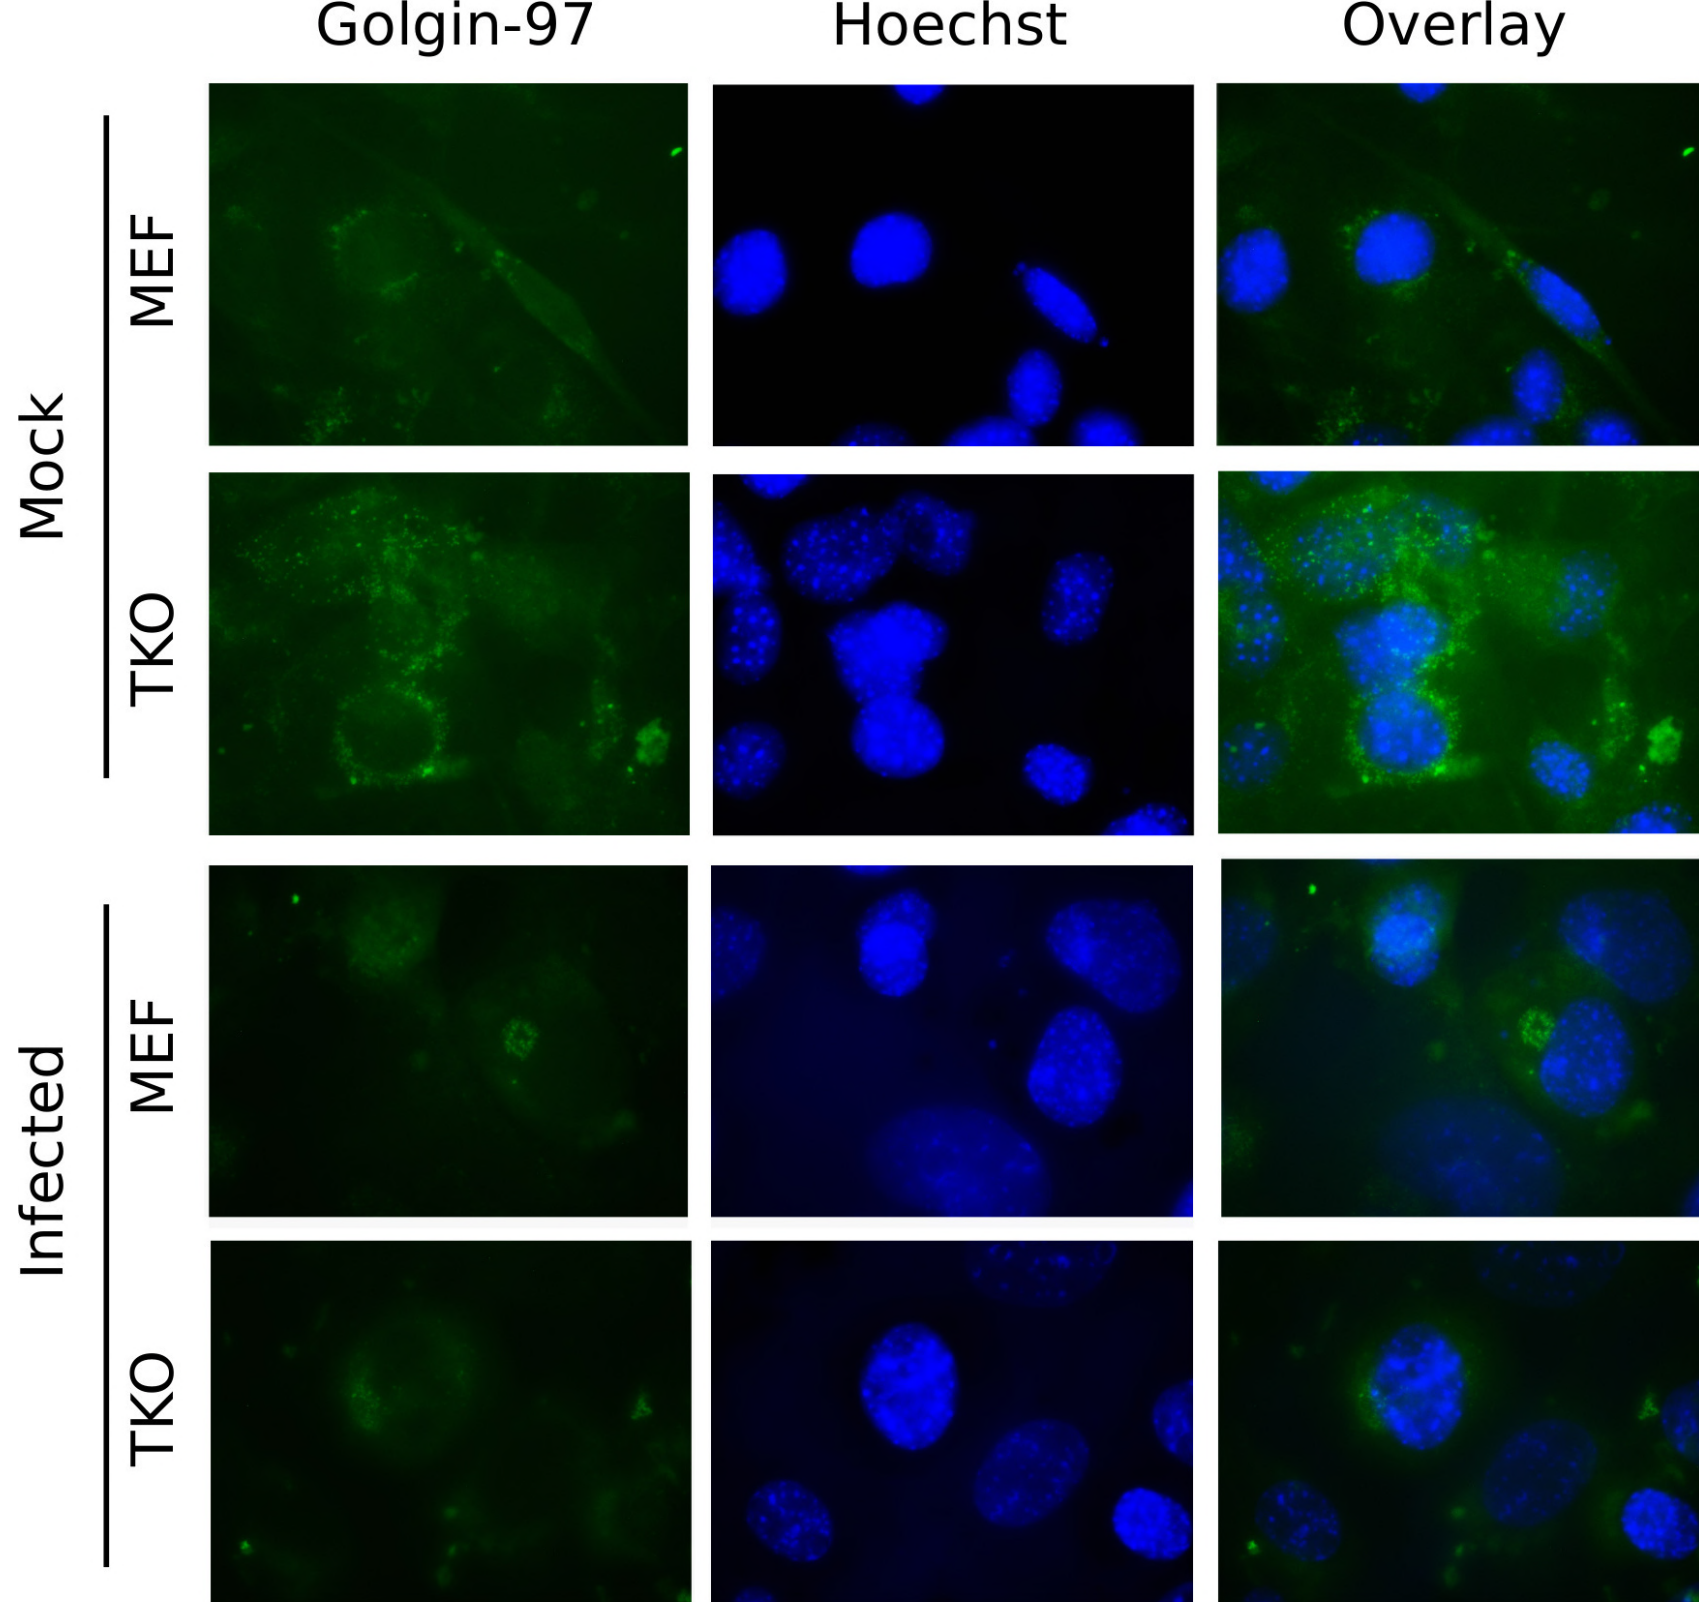



MEF

TKO

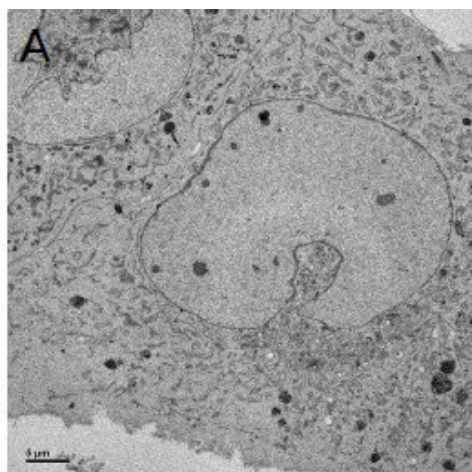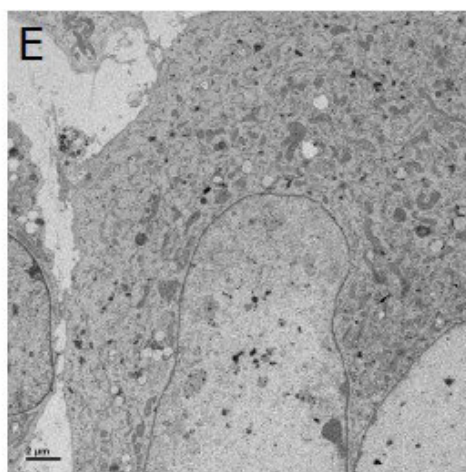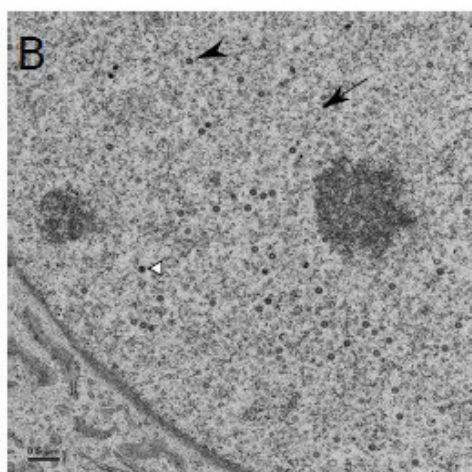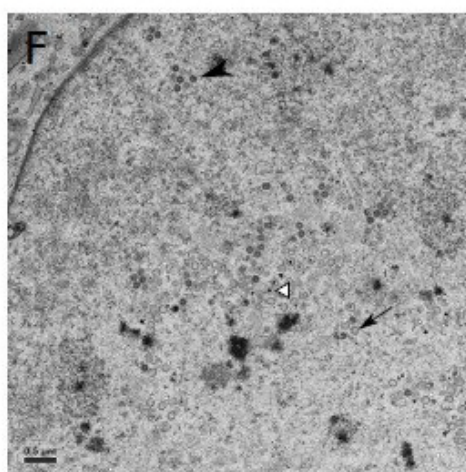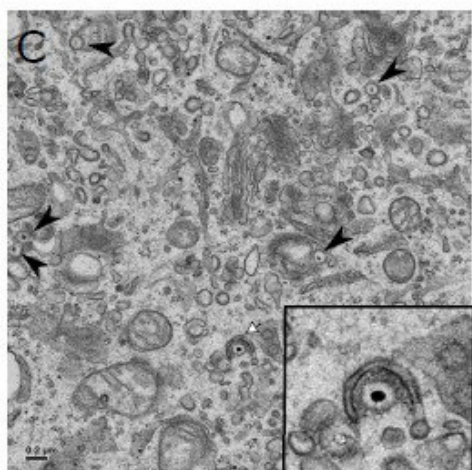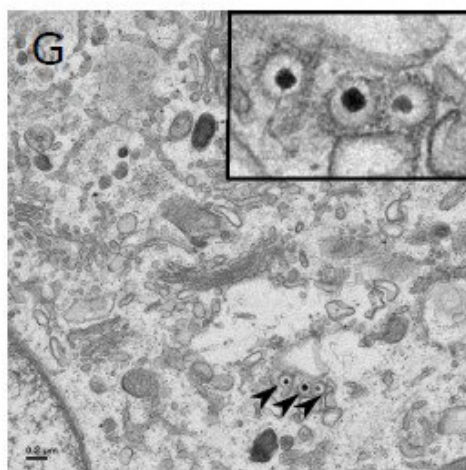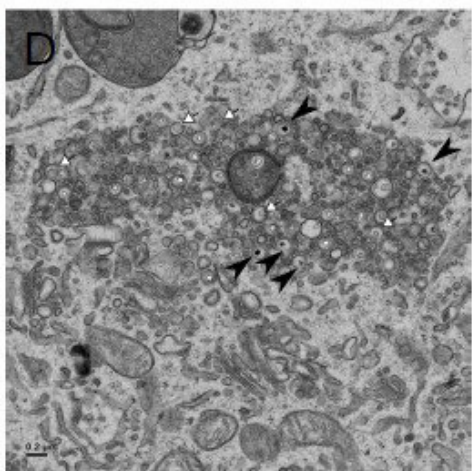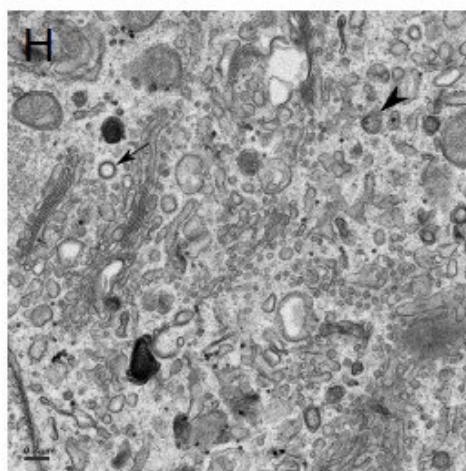

I.

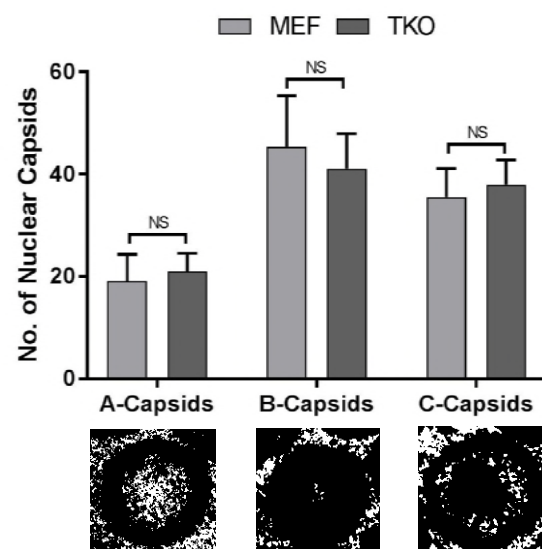

J.

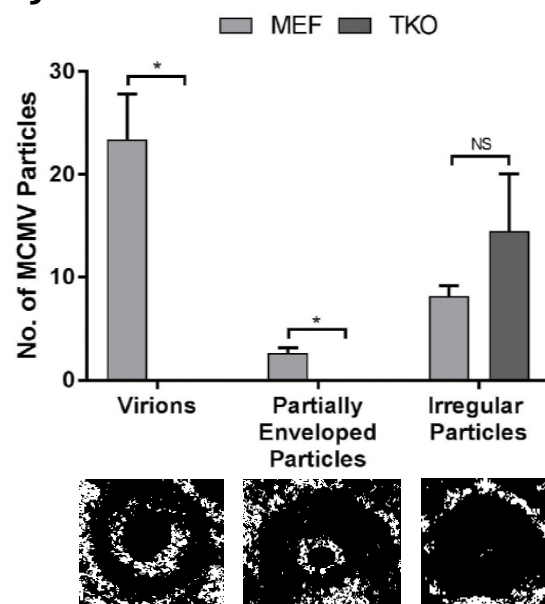

A.

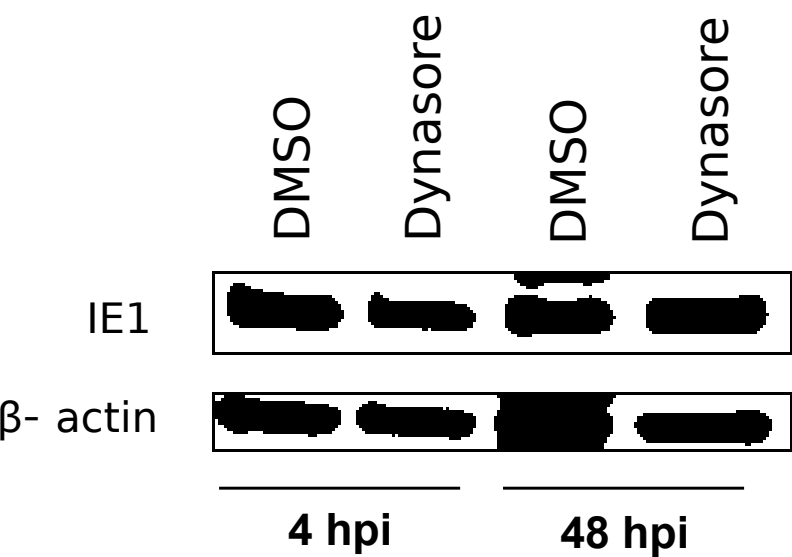

B.

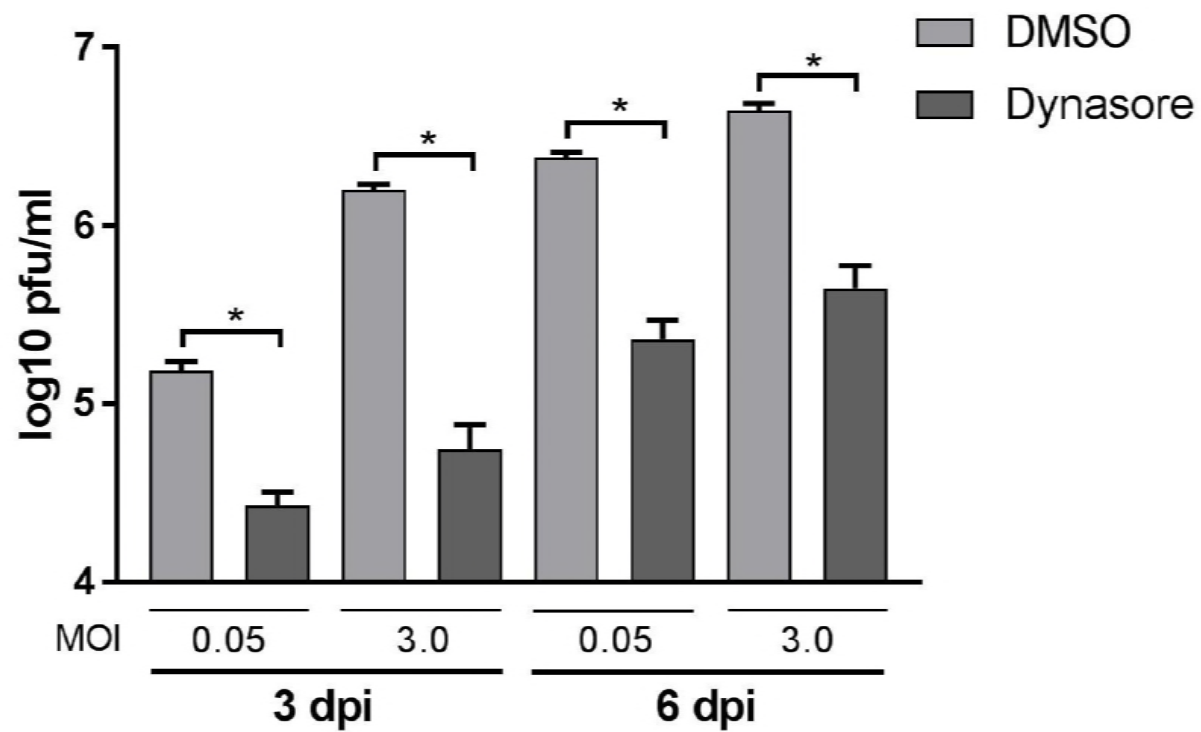

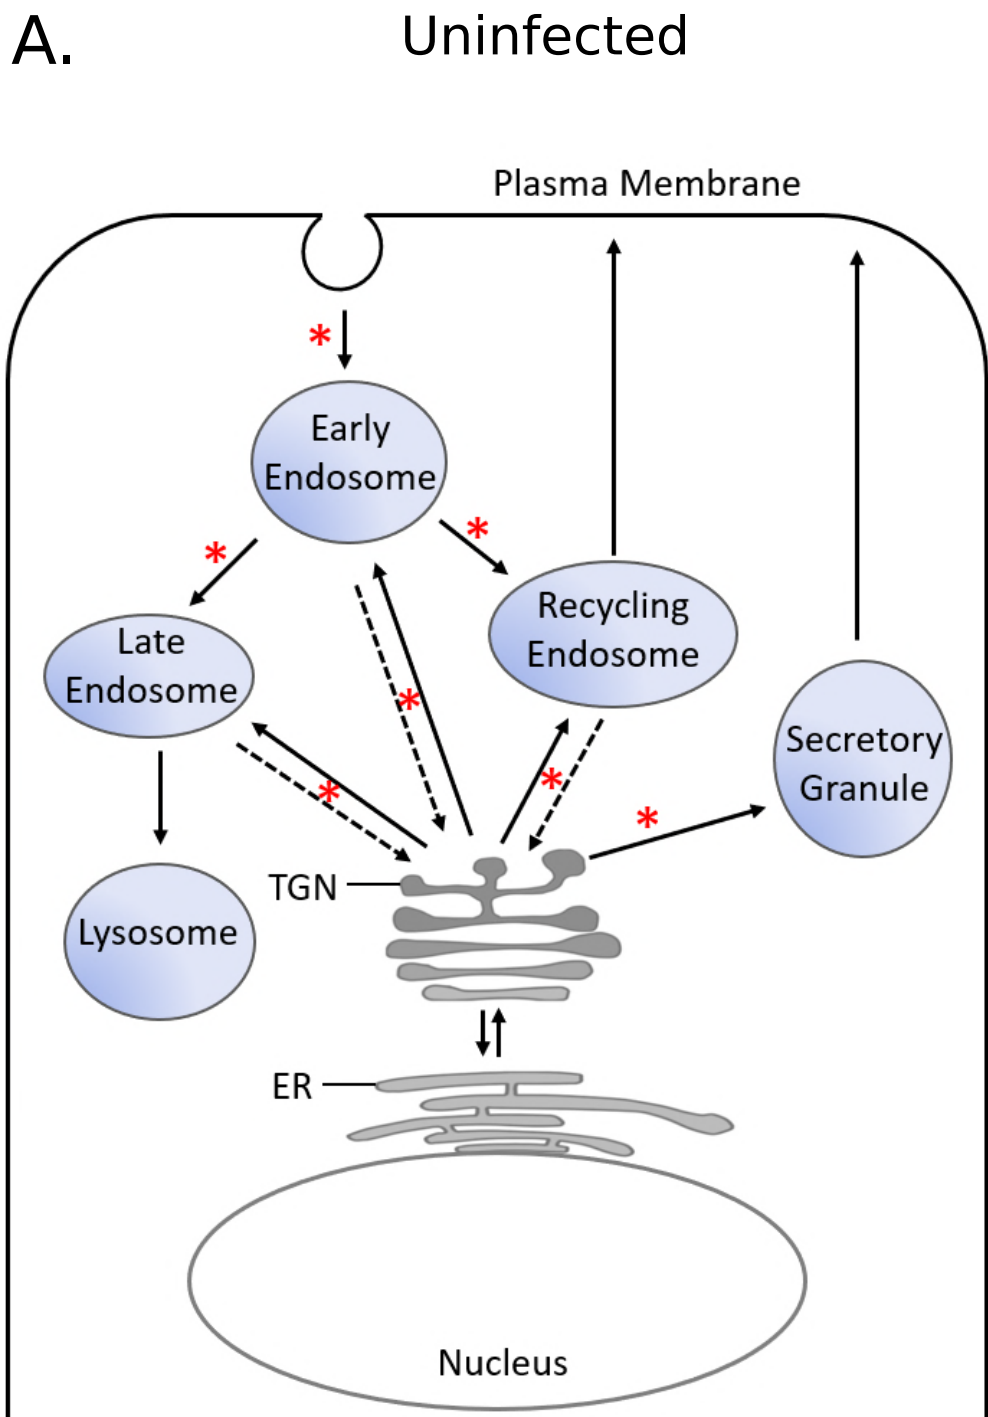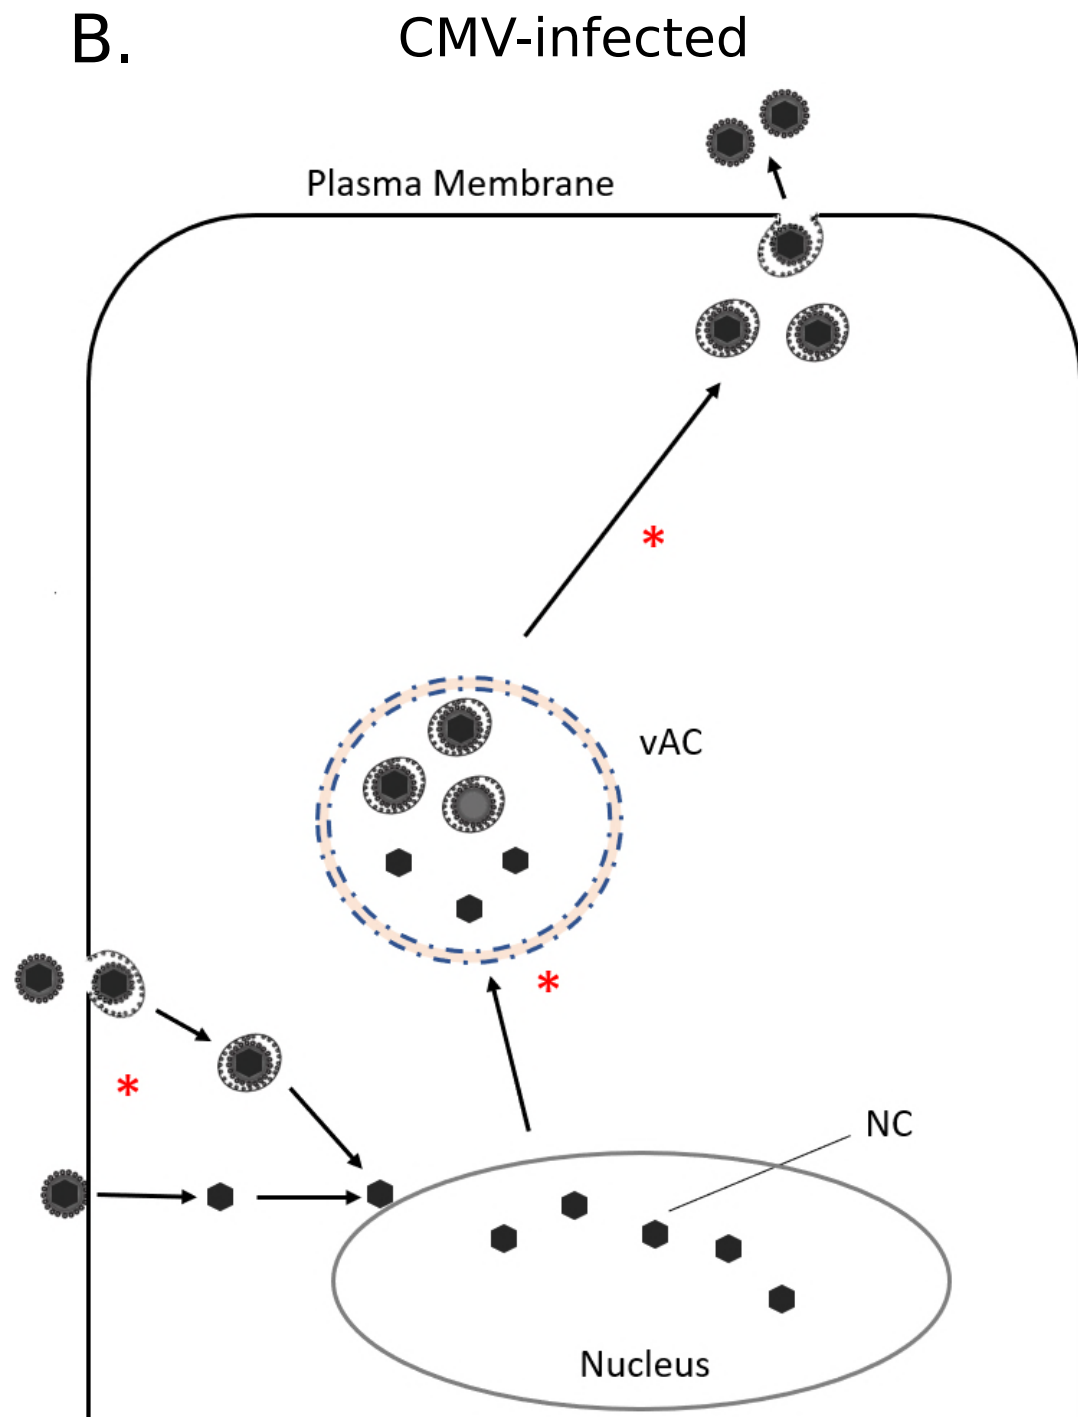

Source: https://www.biorxiv.org/content/10.1101/396820v1.full.pdf
